# Supplementary material for: In situ polymerization of an electrochemically stable dual-salt gel polymer electrolyte for lithium ion batteries
Source: Royal Society of Chemistry journal article supplement (doi:10.1039/d4ta07337a), 2025-01-01
Supplement: d4ta07337a1.pdf [file d4ta07337a1.pdf]

ARTICLE

## In-situ polymerization of electrochemically stable dual-salt gel polymer electrolyte for lithium ion batteries† (Electronic Supplementary Information)

Received 00th January 20xx,  
Accepted 00th January 20xx

DOI: 10.1039/x0xx00000x

Yen-Shen Kuo,<sup>a</sup> Jhang-Yao Hong,<sup>a</sup> Wei-Lung Chou,<sup>\*\*b</sup> and Yi-Hung Liu<sup>\*a</sup>

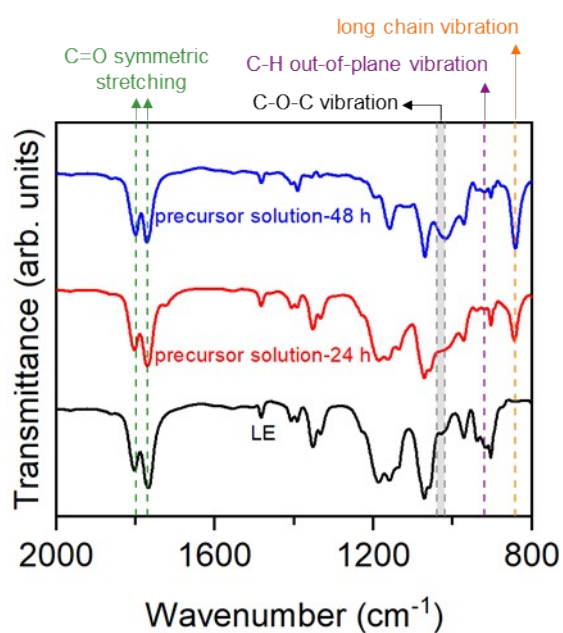

Fig. S1 FTIR spectrum of precursor solution with different gelation times and LE.

<sup>a,a</sup> Department of Chemical and Materials Engineering, National Central University, No.300, Zhongda Road, Zhongli District, Taoyuan City 320317, Taiwan.

<sup>b,b</sup> Department of Safety, Health and Environmental Engineering, Hungkuang University, No. 1018, Sec. 6, Taiwan Boulevard, Shalu District, Taichung City 433304, Taiwan.

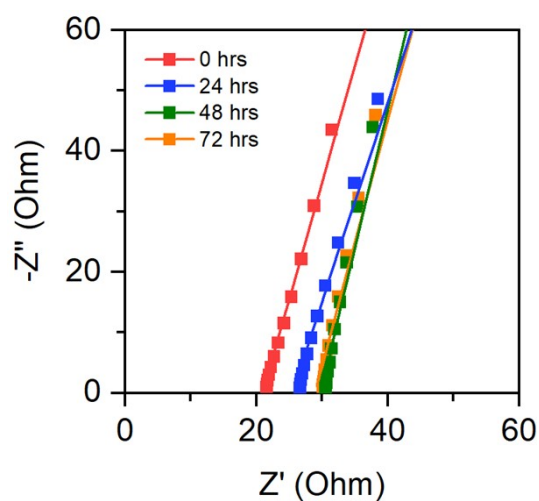

Fig. S2 EIS spectra of GPE with different gelation times.

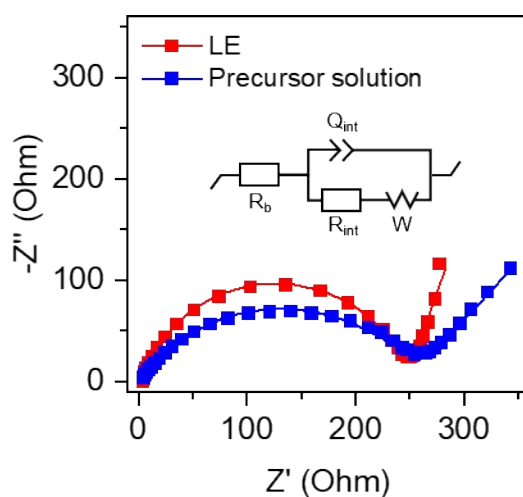

Fig. S3 EIS spectra of Li | precursor solution | LFP and Li | LE | LFP cells. (Inset is the equivalent circuit to fit the plots, where  $R_b$  represents the equivalent series resistance,  $R_{int}$  represents the interfacial resistance between electrolyte and electrode, and  $W$  represents Warburg impedance.)

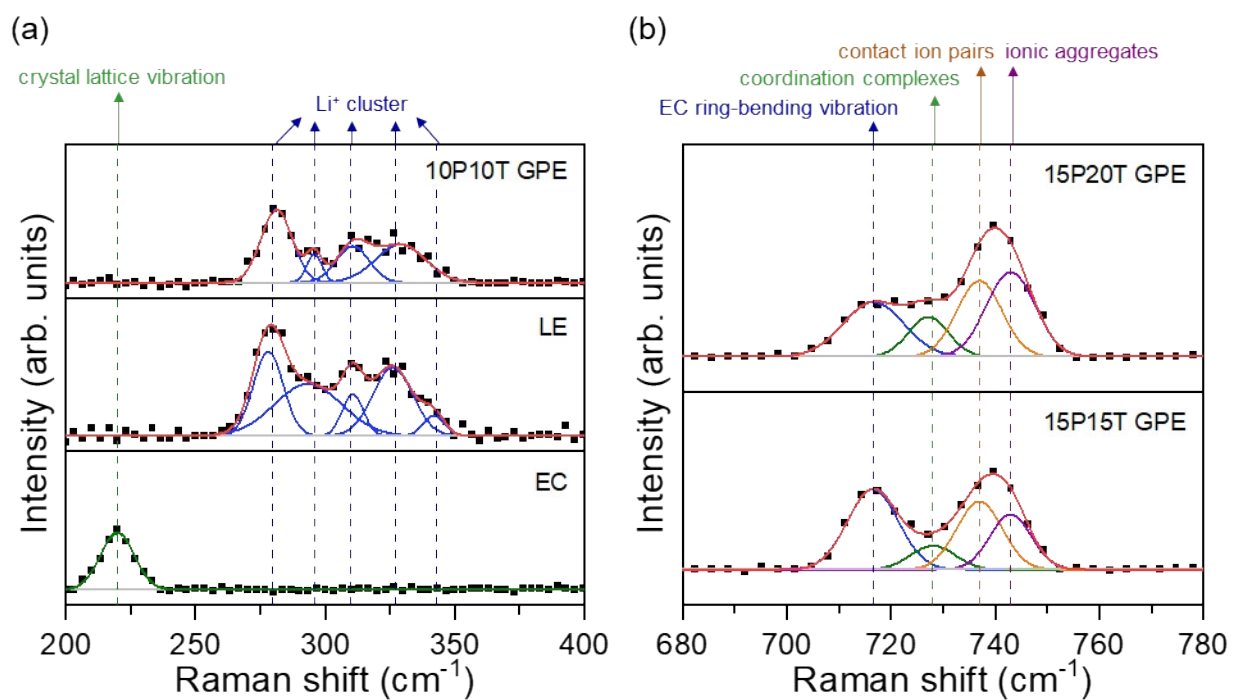

Fig. S4 Raman spectra of (a) EC, LE and 10P10T GPE. (b) 15P15T and 15P20T GPE. (square dots: experiment points; solid lines: fitting results)

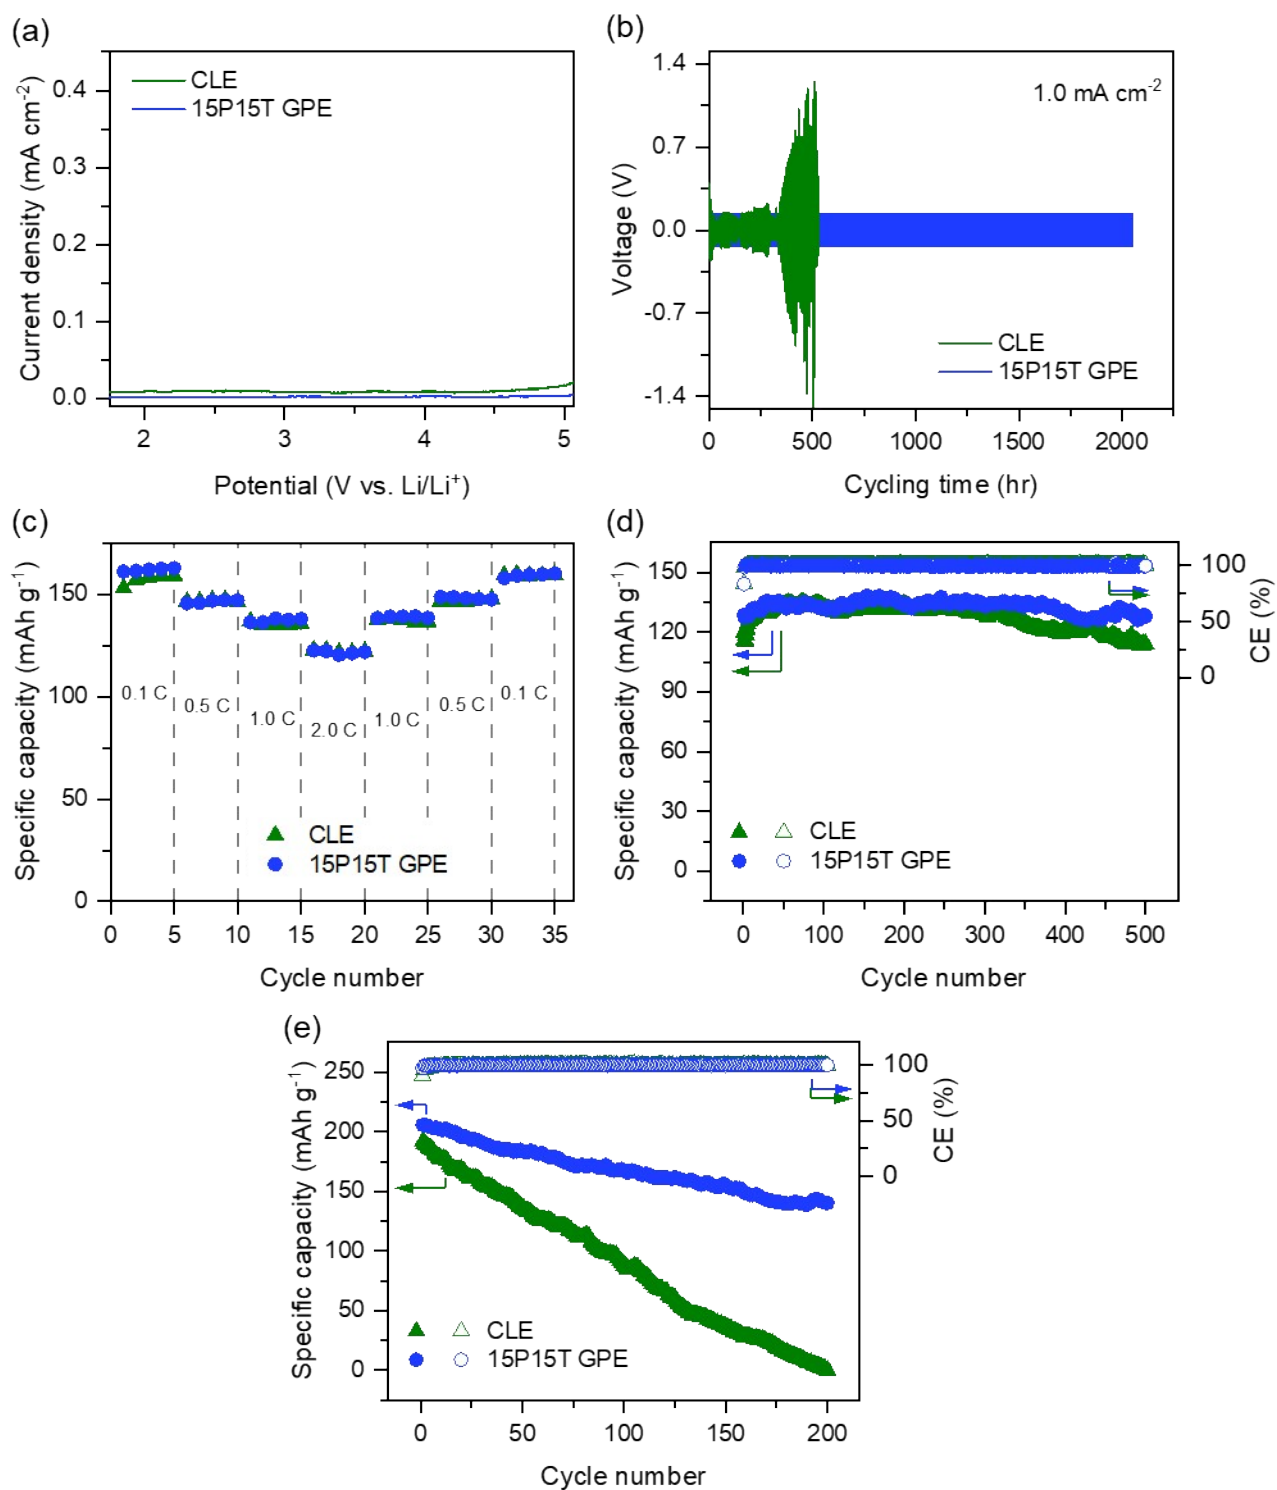

Fig. S5 (a) LSV curves of CLE and 15P15T GPE. (b) Cyclic lithium stripping/plating behaviors of Li||Li symmetrical batteries with CLE and 15P15T GPE. (c) Rate performance of Li||CLE||LFP and Li||15P15T GPE||LFP cells. (d) Cycle performance and Coulombic efficiencies of Li||CLE||LFP and Li||15P15T GPE||LFP cells at 1 C. (e) Cycle performance and Coulombic efficiencies of Li||CLE||NCM811 and Li||15P15T GPE||NCM811 cells at 0.2 C.

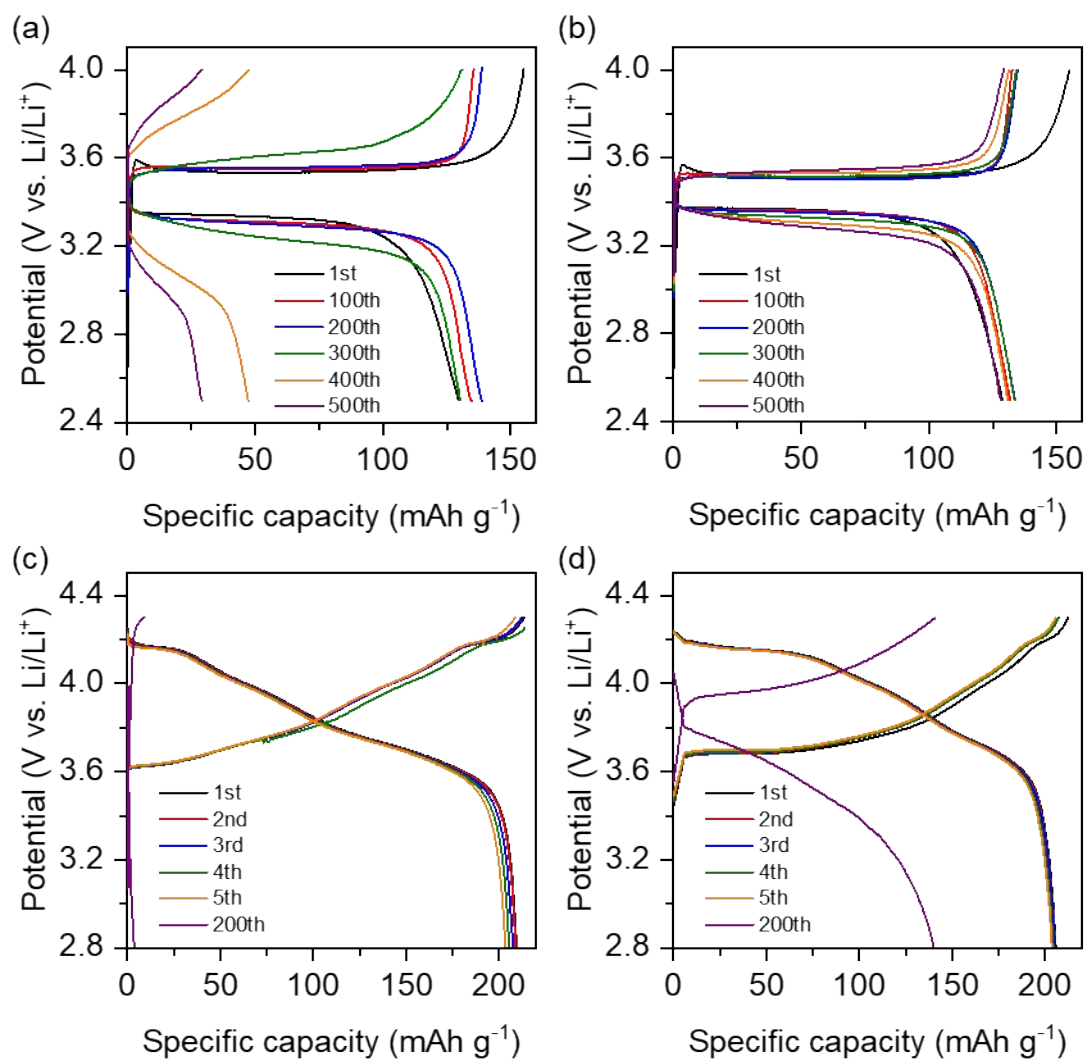

Fig. S6 Charge/discharge curves of (a) Li||LE||LFP and (b) Li||15P15T GPE||LFP cells at 1 C. Charge/discharge curves of (c) Li||LE||NCM811 and (d) Li||15P15T GPE||NCM811 cells at 0.2 C.

Table S1 The best fitting results of the interfacial resistance for the impedance spectra of Li||precursor solution||LFP and Li||LE||LFP cells.

| Sample             | Bulk resistance (ohm) |
|--------------------|-----------------------|
| Precursor solution | 251.0                 |
| LE                 | 243.7                 |

Table S2 Results of degree of polymerization, ionic conductivity, and Li<sup>+</sup> transference number of LE and different LiPF<sub>6</sub> concentrations of GPE.

| Sample     | Degree of polymerization | Bulk resistance (ohm) | Ionic conductivity (S/cm) | Li <sup>+</sup> transference number |
|------------|--------------------------|-----------------------|---------------------------|-------------------------------------|
| LE         | -                        | 1.7                   | $7.30 \times 10^{-4}$     | 0.25                                |
| 10P10T GPE | 78.9%                    | 45.0                  | $2.76 \times 10^{-5}$     | 0.42                                |
| 15P10T GPE | 80.5%                    | 37.0                  | $3.35 \times 10^{-5}$     | 0.57                                |
| 20P10T GPE | 78.0%                    | 44.1                  | $2.81 \times 10^{-5}$     | 0.50                                |

Table S3 Results of degree of polymerization, ionic conductivity, and Li<sup>+</sup> transference number of different LiTFSI concentrations of GPE.

| Sample     | Degree of polymerization | Bulk resistance (ohm) | Ionic conductivity (S/cm) | Li <sup>+</sup> transference number |
|------------|--------------------------|-----------------------|---------------------------|-------------------------------------|
| 15P10T GPE | 80.5%                    | 37.0                  | $3.35 \times 10^{-5}$     | 0.57                                |
| 15P15T GPE | 84.3%                    | 29.8                  | $4.16 \times 10^{-5}$     | 0.63                                |
| 15P20T GPE | 77.6%                    | 39.3                  | $3.15 \times 10^{-5}$     | 0.56                                |

Table S4 The proportion of peak areas in the Raman spectra of the 15P15T and 15P20T GPE.

| Sample     | Coordination complexes | Contact ion pairs | Ionic aggregates |
|------------|------------------------|-------------------|------------------|
| 15P15T GPE | 16.4%                  | 48.1%             | 35.5%            |
| 15P20T GPE | 17.5%                  | 37.5%             | 45.0%            |
